# Supplementary material for: A Novel Gelatin-Based Sustained-Release Molluscicide for Control of the Invasive Agricultural Pest and Disease Vector Pomacea canaliculata
Source: MDPI journal article supplement (doi:10.3390/molecules27134268), 2022-07-02
Supplement: s1 [file s1]

**Table S1.** Average mortality rates of gelatin including molluscicide on *Pomacea canaliculata* (%).

| Concentration | 12h   | Mean±SD | 24h   | Mean±SD | 48h   | Mean±SD | 72h   | Mean±SD | 96h  | Mean±SD |
|---------------|-------|---------|-------|---------|-------|---------|-------|---------|------|---------|
| 1             | 53.33 | 5.77    | 76.67 | 5.77    | 100   | 0       | 100   | 0       | 100  | 0       |
| 0.5           | 26.67 | 11.55   | 53.33 | 5.77    | 96.67 | 5.77    | 100   | 0       | 100  | 0       |
| 0.1           | 3.33  | 5.77    | 20    | 10      | 50    | 10      | 83.33 | 5.77    | 100  | 0       |
| 0.05          | 0     | 0       | 10    | 10      | 30    | 10      | 70    | 10      | 100  | 0       |
| 0             | 0     | 0       | 0     | 0       | 0     | 0       | 0     | 0       | 3.33 | 5.77    |

**Table S2.** Regression and correlation analysis on toxicity of niclosamide gelatin sustained-release agent to *Pomacea Canaliculata*.

| Time | Regression equation | R <sup>2</sup> | LC <sub>50</sub> ( mg/L) | 95% Confidence interval | R     | P value |
|------|---------------------|----------------|--------------------------|-------------------------|-------|---------|
| 12h  | y = 2.340x-2.123    | 0.955          | 0.907                    | 0.685-1.427             | 0.975 | 0.005   |
| 24 h | y = 2.263x-1.333    | 0.945          | 0.589                    | 0.404-0.899             | 1     | <0.001  |
| 48 h | y = 6.587x-1.029    | 0.988          | 0.156                    | 0.083-0.338             | 1     | <0.001  |
| 72 h | y = 18.870x-0.948   | 1              | 0.05                     | 0.009-0.087             | 0.975 | 0.005   |
| 96 h | y = 26.185x-0.651   | <0.001         | 0.025                    | -0.015~0.051            | 0.707 | 0.182   |

PS: LC50 is 50% lethal concentration. Y is the probability unit of death and x is the concentration of niclosamide gelatin sustained release agent.

Table S3. Average mortality rates of zebrafish exposed to Niclosamide under different temperatures (%)

| <b>Concentration of Ni-closamide (mg/L)</b> | <b>2h</b> | <b>4h</b> | <b>6h</b> | <b>8h</b> | <b>12h</b> | <b>24h</b> | <b>48h</b> | <b>72h</b> | <b>96h</b> | <b>120h</b> | <b>144h</b> | <b>168h</b> | <b>192h</b> |
|---------------------------------------------|-----------|-----------|-----------|-----------|------------|------------|------------|------------|------------|-------------|-------------|-------------|-------------|
| 1 (gelatin)                                 | 0         | 0         | 0         | 0         | 0          | 0          | 0          | 6          | 20         | 23.3        | 23.3        | 23.3        | 23.3        |
| 0.5 (gelatin)                               | 0         | 0         | 0         | 0         | 0          | 0          | 0          | 3          | 10         | 13.3        | 13.3        | 13.3        | 13.3        |
| 0.1 (gelatin)                               | 0         | 0         | 0         | 0         | 0          | 0          | 0          | 0          | 0          | 0           | 0           | 0           | 0           |
| 0.05 (gelatin)                              | 0         | 0         | 0         | 0         | 0          | 0          | 0          | 0          | 0          | 0           | 0           | 0           | 0           |
| 0 (gelatin)                                 | 0         | 0         | 0         | 0         | 0          | 0          | 0          | 0          | 0          | 0           | 0           | 0           | 0           |
| 1 (solution)                                | 100       | 100       | 100       | 100       | 100        | 100        | 100        | 100        | 100        | 100         | 100         | 100         | 100         |
| 0.5 (solution)                              | 100       | 100       | 100       | 100       | 100        | 100        | 100        | 100        | 100        | 100         | 100         | 100         | 100         |
| 0.1 (solution)                              | 0         | 0         | 0         | 20        | 50         | 70         | 90         | 100        | 100        | 100         | 100         | 100         | 100         |
| 0.05 (solution)                             | 0         | 0         | 0         | 0         | 0          | 0          | 10         | 20         | 50         | 50          | 50          | 50          | 50          |

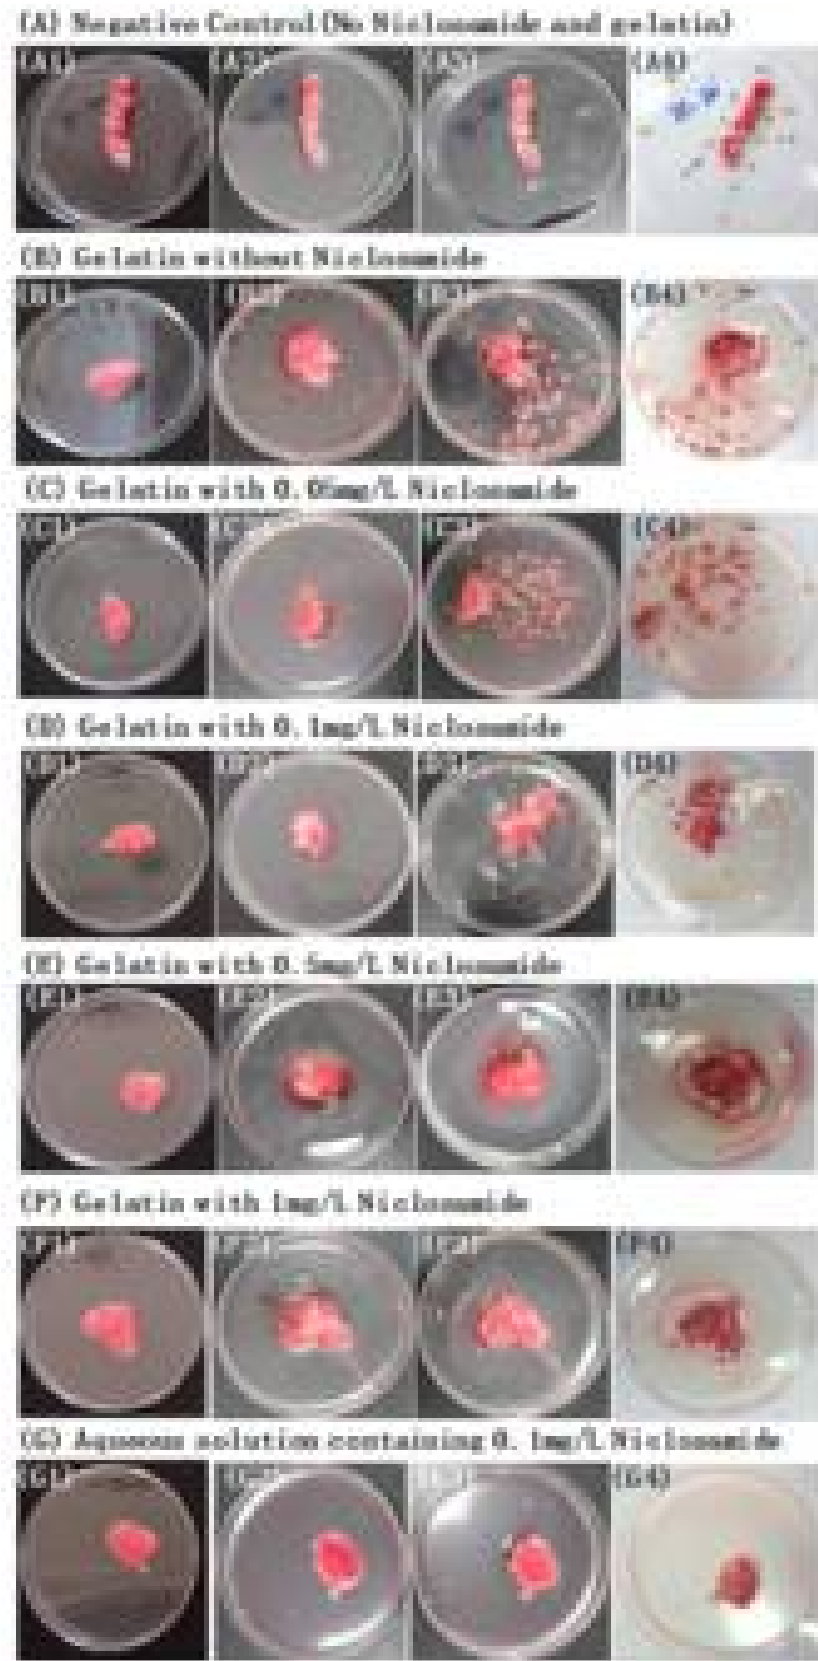

**Figure S1.** A1, A2, A3, and A4 represent *P. canaliculata* eggs without niclosamide and gelatin treatment at 0, 5, 10, and 15 days. (B) B1, B2, B3, and B4 represent *P. canaliculata* eggs treated with gelatin with no niclosamide for 0, 5, 10, and 15 days. (C) C1, C2, C3, and C4 represent *P. canaliculata* eggs treated using gelatin with 0.05 mg/L niclosamide for 0, 5, 10, and 15 days. (D) D1, D2, D3, and D4 represent *P. canaliculata* eggs treated using gelatin with 0.1 mg/L niclosamide for 0, 5, 10, and 15 days, respectively. (E) E1, E2, E3, and E4 represent *P. canaliculata* eggs treated using gelatin with 0.5 mg/L niclosamide for 0, 5, 10, and 15 days, respectively. (F) F1, F2, F3, and F4 represent *P. canaliculata* eggs treated using gelatin with 1 mg/L niclosamide for 0, 5, 10, and 15 days, respectively. (G) G1,

G2, G3, and G4 represent *P. canaliculata* eggs treated using an aqueous solution with 0.1 mg/L niclosamide for 0, 5, 10, and 15 days, respectively.
